# Supplementary material for: An MnO2 nanosheet@nitrogen-doped graphene aerogel enables high specific energy and high specific power for supercapacitors and Zn–air batteries
Source: Royal Society of Chemistry journal article supplement (doi:10.1039/d0ta12247e), 2021-01-01
Supplement: d0ta12247e1.pdf [file d0ta12247e1.pdf]

*Electronic Supplementary Material*

**MnO<sub>2</sub> nanosheets@nitrogen-doped graphene aerogel enable high specific energy  
and high specific power for supercapacitor and Zn-air battery**

Hui Zhao<sup>a</sup>, Rijuan Jiang<sup>a</sup>, Yong Zhang<sup>a</sup>, Beibei Xie<sup>a</sup>, Jiali Fu<sup>a</sup>, Xiaona Yuan<sup>a</sup>, Wenxin Yang<sup>a</sup>, Yan Wu<sup>a</sup>, and Renjie Zhang<sup>a,b,c\*</sup>

<sup>a</sup> Key Laboratory of Colloid and Interface Chemistry of the Ministry of Education of the P. R. China, Shandong University, Jinan 250100, P. R. China

<sup>b</sup> Key Laboratory of Special Functional Aggregated Materials of the Ministry of Education of the P.R. China, Shandong University, Jinan 250100, P. R. China

<sup>c</sup> National Engineering Technology Research Center for Colloidal Materials, Shandong University, Jinan 250100, P. R. China

\*Corresponding author, Email: zhrj@sdu.edu.cn

## **EXPERIMENTAL**

### **Synthesis of GO**

GO was prepared by modified Hummers' method,<sup>1</sup> followed by washing several times with 5% HCl and water. Then GO was sonicated (300 W) for 8 h below 25 °C.<sup>2</sup> Finally, a homogeneous GO aqueous suspension was obtained and used for preparation of NGA and MNSs@NGA.

### **Calculation of the ratio of exposed surficial unit cells**

The ratio of exposed surficial unit cells is calculated by dividing number of exposed surficial unit cells ( $N_1$ ) by total number of unit cells ( $N_2$ ) according to the following equation (S1):

$$\text{Ratio of exposed unit cells} = \frac{N_1}{N_2} = \frac{S_1/S_2}{V_1/V_2} \quad (\text{S1})$$

Where  $S_1$  is surface area of three exposed surface of a single  $\text{MnO}_2$  nanosheet,  $S_2$  is area of the rhombus section of a  $[\text{MnO}_6]$  regular octahedron,  $V_1$  is volume of a single  $\text{MnO}_2$  nanosheet and  $V_2$  is volume of a  $[\text{MnO}_6]$  regular octahedron. Assuming the  $\text{MnO}_2$  nanosheet is a cuboid, the length, width and height of the cuboid are 100, 50 and 5 nm, respectively.  $V_1$  is  $25000 \text{ nm}^3$  and  $S_1$  is  $10000 \text{ nm}^2$ .  $V_2$  is  $0.086 \text{ nm}^3$  and  $S_2$  is  $0.092 \text{ nm}^2$ . Therefore, the ratio of exposed surficial unit cells is 37.4%.

## SUPPLEMENTARY FIGURES AND TABLES

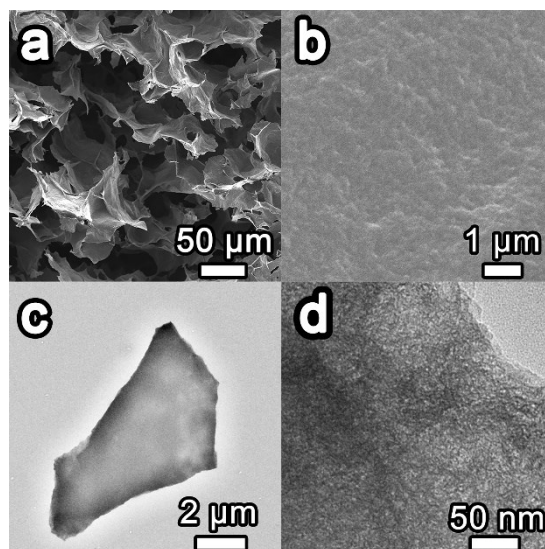

**Fig. S1** (a, b) SEM images and (c, d) TEM images of NGA at different magnifications.

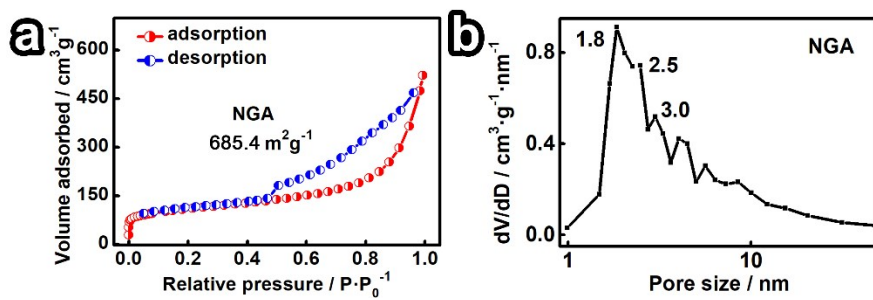

**Fig. S2** (a) N<sub>2</sub> adsorption-desorption isotherms at -196 °C and (b) pore size distribution of NGA.

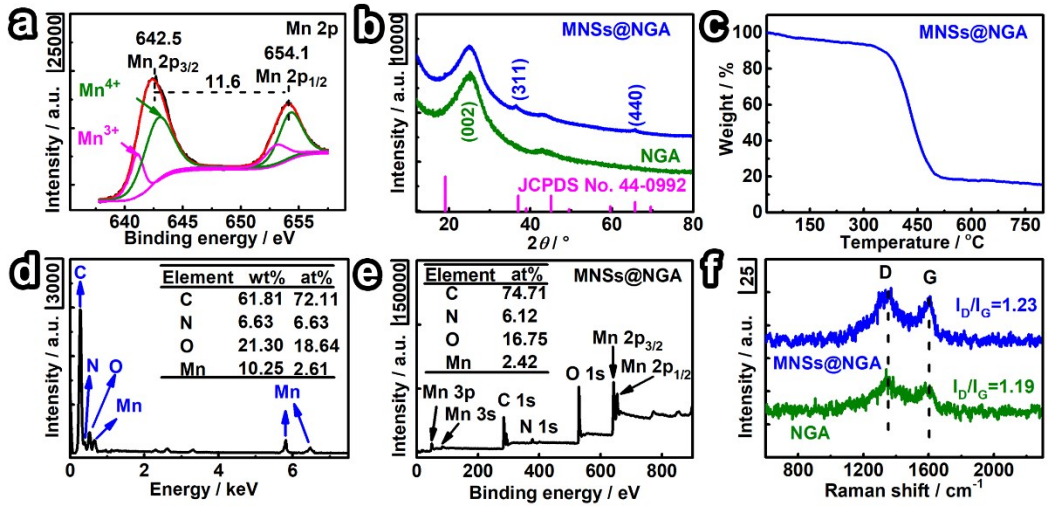

**Fig. S3** (a) Mn 2p XPS spectrum of MNSs@NGA. (b) XRD patterns of MNSs@NGA, NGA and  $\lambda$ -MnO<sub>2</sub> (JCPDS 44-0992). (c) TGA curve of MNSs@NGA. (d) EDX spectrum and quantitative analysis of MNSs@NGA. (e) Sum XPS spectrum and quantitative analysis of MNSs@NGA. (f) Raman spectra of MNSs@NGA and NGA.

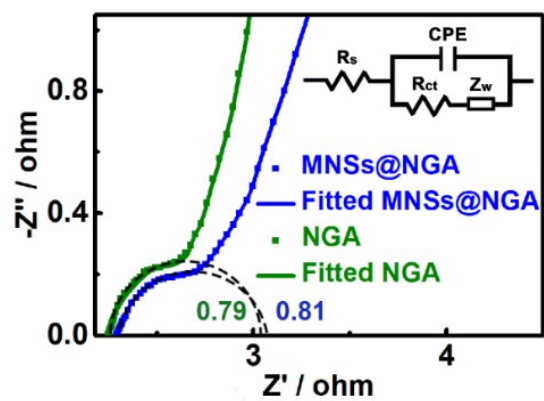

**Fig. S4** Nyquist plots of MNSs@NGA and NGA from EIS measurements in  $O_2$ -saturated 0.1 M KOH solution.

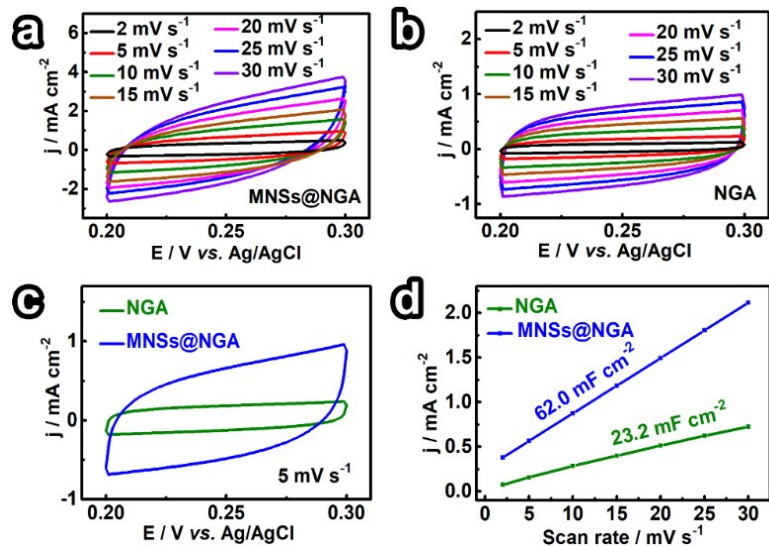

**Fig. S5** CV curves of (a) MNSs@NGA and (b) NGA at different scan rates in 1.0 M KOH at the voltage range of 0.20-0.30 V (*vs.* Ag/AgCl). (c) CV curves at a scan rate of 5 mV s<sup>-1</sup> and (d) the current density at 0.25 V (*vs.* Ag/AgCl) against scan rate of MNSs@NGA and NGA.

**Table S1** Comparison of supercapacitor performance between MNSs@NGA and reported MnO<sub>x</sub>-based materials

| Sample                                | Morphology                                                                          | Specific surface area / m <sup>2</sup> g <sup>-1</sup> | Voltage window / V | Electrolyte                           | Specific capacitance / F g <sup>-1</sup> | Rate capability                                  | Cycling stability                                 | Ref.                                       |
|---------------------------------------|-------------------------------------------------------------------------------------|--------------------------------------------------------|--------------------|---------------------------------------|------------------------------------------|--------------------------------------------------|---------------------------------------------------|--------------------------------------------|
| CNT/MnO <sub>2</sub> /rGO             | 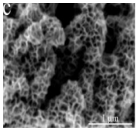   | --                                                     | 0-0.8              | 1.0 M Na <sub>2</sub> SO <sub>4</sub> | 298 at 0.5 A g <sup>-1</sup>             | 207.0 F g <sup>-1</sup> at 10 A g <sup>-1</sup>  | 90.3% after 5000 cycles at 10 A g <sup>-1</sup>   | Carbon 2018, 132, 776.                     |
| MnO <sub>2</sub> /GO composites       |    | 162.0                                                  | 0.1-0.9            | 1.0 M Na <sub>2</sub> SO <sub>4</sub> | 297 at 5 mV s <sup>-1</sup>              | 268.0 F g <sup>-1</sup> at 50 mV s <sup>-1</sup> | --                                                | Small 2015, 11 (11), 1310-1319.            |
| bowl-like MnO <sub>2</sub> nanosheets |   | 182.4                                                  | 0-0.8              | 1.0 M Na <sub>2</sub> SO <sub>4</sub> | 379 at 0.5 A g <sup>-1</sup>             | 229.0 F g <sup>-1</sup> at 10 A g <sup>-1</sup>  | 87.3% after 5000 cycles at 0.5 A g <sup>-1</sup>  | Chem. Eng. J. 2018, 350, 79.               |
| diatom/MnO <sub>2</sub>               |  | 67.3                                                   | -0.2-0.8           | 1.0 M Na <sub>2</sub> SO <sub>4</sub> | 371.2 at 0.5 A g <sup>-1</sup>           | 203.0 F g <sup>-1</sup> at 10 A g <sup>-1</sup>  | 93.1% after 2000 cycles at 5 A g <sup>-1</sup>    | J. Mater. Chem. A 2015, 3 (15), 7855-7861. |
| MnO <sub>2</sub> -NHCSs               |  | 213.1                                                  | -0.1-0.9           | 1.0 M Na <sub>2</sub> SO <sub>4</sub> | 392 at 0.5 A g <sup>-1</sup>             | 222.0 F g <sup>-1</sup> at 10 A g <sup>-1</sup>  | --                                                | Mater. Chem. Front. 2020, 4 (1), 213-221.  |
| MNSs@NGA                              |  | 821.3                                                  | -0.2-1             | 1.0 M Na <sub>2</sub> SO <sub>4</sub> | 690.2 at 1 A g <sup>-1</sup>             | 563.2 F g <sup>-1</sup> at 20 A g <sup>-1</sup>  | 95.2% after 10 000 cycles at 10 A g <sup>-1</sup> | This work                                  |

CNT/MnO<sub>2</sub>/rGO: carbon nanotube@manganese oxide nanosheet core-shell structure encapsulated

within reduced graphene oxide film

MnO<sub>2</sub>-NHCSs: ultrathin MnO<sub>2</sub> nanoflakes grown on N-doped hollow carbon spheres



**Table S2** Comparison of asymmetrical supercapacitor performance between MNSs@NGA and reported MnO<sub>x</sub>-based materials

| ASC                                                | Morphology                                                                          | Voltage window / V | Electrolyte                           | Specific capacitance / F g <sup>-1</sup> | E / Wh kg <sup>-1</sup> | P / W kg <sup>-1</sup> | Cycling stability                               | Ref.                                         |
|----------------------------------------------------|-------------------------------------------------------------------------------------|--------------------|---------------------------------------|------------------------------------------|-------------------------|------------------------|-------------------------------------------------|----------------------------------------------|
| ACEP@MnO <sub>2</sub> //AC                         | 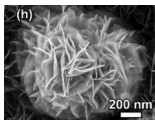   | 0-2.0              | 1.0 M Na <sub>2</sub> SO <sub>4</sub> | 111.6 at 0.5 A g <sup>-1</sup>           | 31                      | 500                    | ~100% after 5000 cycles at 5 A g <sup>-1</sup>  | ACS Sustainable Chem. Eng. 2018, 6 (1), 633. |
| MnO <sub>2</sub> /GO//HPC                          |    | 0-2.0              | 1.0 M Na <sub>2</sub> SO <sub>4</sub> | 52 at 1.0 A g <sup>-1</sup>              | 46.7                    | 100                    | 93% after 4000 cycles at 1 A g <sup>-1</sup>    | Small 2015, 11 (11), 1310-1319.              |
| PPy/MnO <sub>2</sub> //N-doped mesoporous carbon   |   | 0-2.0              | 1.0 M Na <sub>2</sub> SO <sub>4</sub> | 69.5 at 0.5 A g <sup>-1</sup>            | 38.6                    | 900                    | 90.6% after 5000 cycles at 5 A g <sup>-1</sup>  | Chem. Eng. J. 2017, 307, 105.                |
| yolk-shell MnO <sub>2</sub> @MnO <sub>2</sub> //AC |  | 0-1.8              | 1.0 M Na <sub>2</sub> SO <sub>4</sub> | 90.8 at 1.0 A g <sup>-1</sup>            | 40.2                    | 891.2                  | 82% after 10000 cycles at 10 A g <sup>-1</sup>  | J. Mater. Chem. A 2018, 6 (4), 1601.         |
| MnO <sub>2</sub> nanoflakes shell@PPy core//AC     |  | 0-2.0              | 1.0 M Na <sub>2</sub> SO <sub>4</sub> | 57 at 1.0 A g <sup>-1</sup>              | 25.8                    | 901.7                  | 90.3% after 6000 cycles at 3 A g <sup>-1</sup>  | Nano Energy 2017, 35, 242.                   |
| Mn <sub>3</sub> O <sub>4</sub> -rGO-2//AC          |  | 0-1.7              | 2.0 M KOH                             | 180.2 at 1.0 A g <sup>-1</sup>           | 72.3                    | 864.0                  | 93.4% after 5000 cycles at 10 A g <sup>-1</sup> | J. Mater. Chem. A 2019, 7, 6686-6694.        |
| MNSs@NGA//AC                                       |  | 0-2.0              | 1.0 M Na <sub>2</sub> SO <sub>4</sub> | 199.0 at 1.0 A g <sup>-1</sup>           | 110.6                   | 1000.4                 | 96.2% after 10000 cycles at 5 A g <sup>-1</sup> | This work                                    |

MnO<sub>2</sub>/GO//HPC: MnO<sub>2</sub>/GO//3D hierarchical porous structure carbon material derived from Artemia cyst shell

Mn<sub>3</sub>O<sub>4</sub>-rGO-2: Mn<sub>3</sub>O<sub>4</sub> hollow spheres with controlled shell numbers in reduced graphene oxide

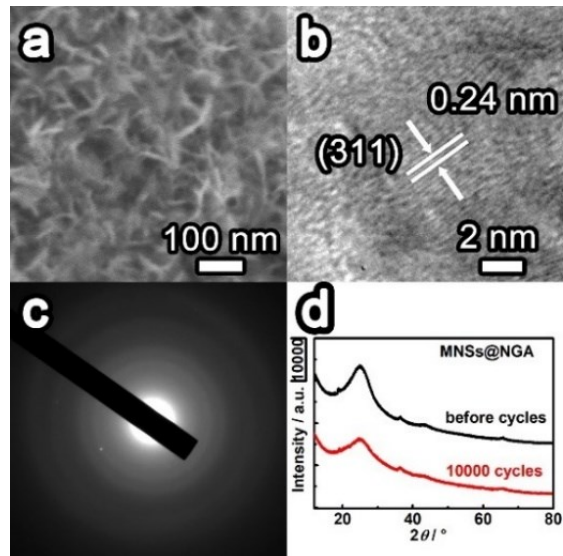

**Fig. S6** (a) SEM image, (b) HRTEM image and (c) SAED pattern of MNSs@NGA after cycling stability test. (d) XRD patterns of MNSs@NGA before and after cycling stability test.

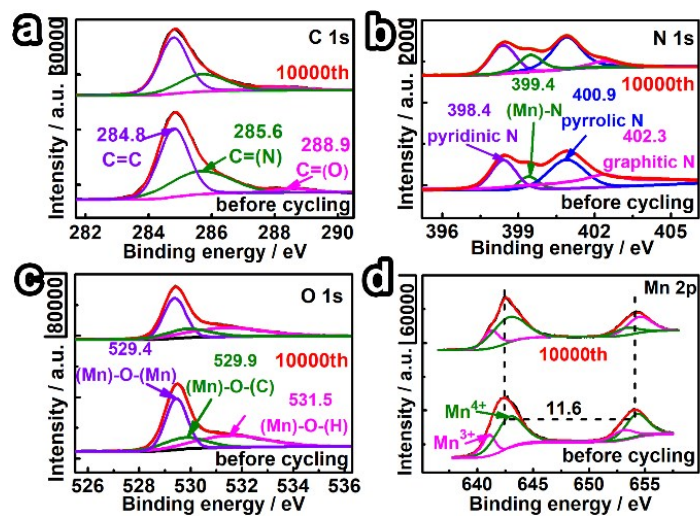

**Fig. S7** (a) C 1s, (b) N 1s, (c) O 1s and (d) Mn 2p XPS spectra of MNSs@NGA before and after cycling stability test.

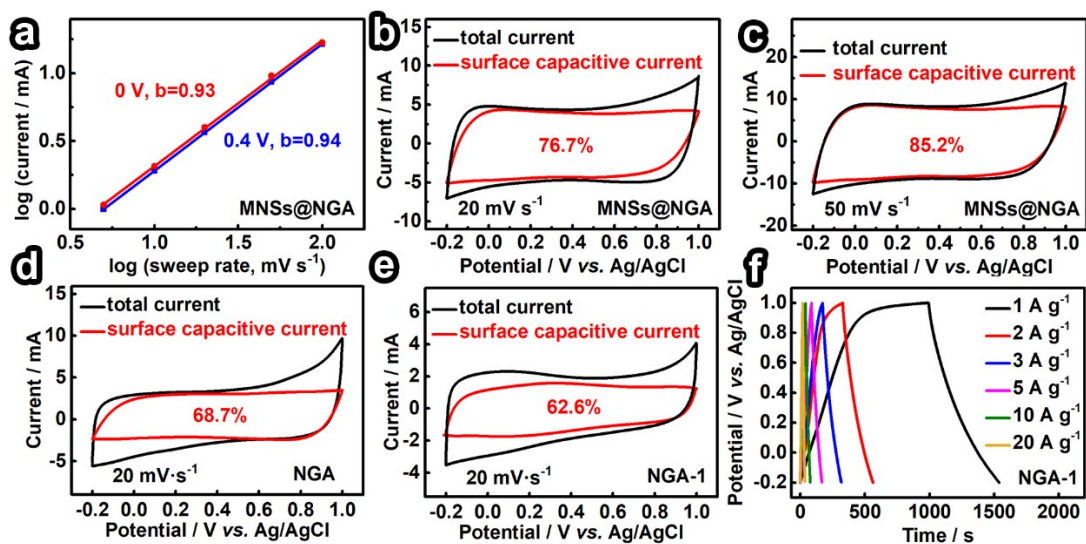

**Fig. S8** (a) a plot of  $\log(i)$  vs.  $\log(v)$  from 5 to 100  $\text{mV s}^{-1}$  for MNSs@NGA. Proportion of surface capacitive current contributions of total current of (a) MNSs@NGA at scan rates of (b) 20 and (c) 50  $\text{mV s}^{-1}$ . Proportion of surface capacitive current contributions of total current of (d) NGA and (e) NGA-1 at the scan rate of 20  $\text{mV s}^{-1}$ . (f) GCD curves at different current densities of NGA-1.

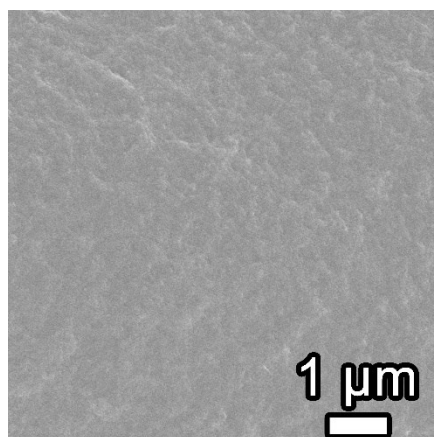

**Fig. S9** SEM image of NGA-1.

**Table S3** ORR catalytic properties comparison of MNSs@NGA to reported MnO<sub>x</sub>-based catalysts

| Sample                              | Morphology                                                                          | Specific surface area / m <sup>2</sup> g <sup>-1</sup> | E <sub>onset</sub> / V | E <sub>1/2</sub> / V | Tafel slope / mV dec <sup>-1</sup> | n    | Cycling stability   | Ref.                                      |
|-------------------------------------|-------------------------------------------------------------------------------------|--------------------------------------------------------|------------------------|----------------------|------------------------------------|------|---------------------|-------------------------------------------|
| Ni-MnO/rGO aerogels                 | 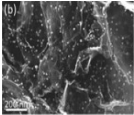   | 109                                                    | 0.94                   | 0.78                 | 85                                 | 4    | 93.7% after 10000 s | Adv Mater. 2018, 30, 1704609.             |
| Mn <sub>3</sub> O <sub>4</sub> /rGO |    | 89                                                     | 0.86                   | 0.76                 | --                                 | 3.96 | 88.5% after 20000 s | J. Colloid Interface Sci. 2017, 488, 251. |
| MnO <sub>2</sub> /rGO               |    | 183                                                    | 0.83                   | 0.69                 | --                                 | 3.85 | --                  | Int. J. Hydrogen Energy 2016, 41, 5260.   |
| Co/MnO                              |   | --                                                     | 0.906                  | 0.819                | 98                                 | 3.89 | 84.2% after 35000 s | Catal. Sci. Technol. 2018, 8, 480.        |
| MNSs@NGA                            |  | 821.3                                                  | 0.97                   | 0.82                 | 76                                 | 3.99 | 87.2% after 50000 s | This work                                 |

GMNCs: Graphene sheets@MnO@ N-doped carbon composites

Co-MONSs/MC: Co ions-doped MnO<sub>2</sub> nanosheets/macroporous carbon composites

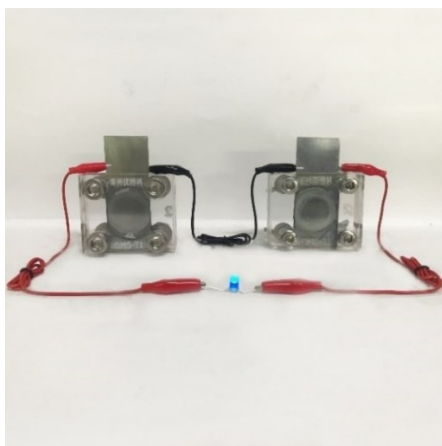

**Fig. S10** Photograph of a blue LED ( $\approx 3$  V) lit by two series Zn-air batteries with MNSs@NGA as air cathode after 24 h.

**Table S4** Comparison of the performances of Zn-air batteries with reported electrocatalysts

| Sample                                    | Electrolyte                                  | Loading mass of catalyst / mg cm <sup>-2</sup> | Open-circuit voltage / V | P/ mW cm <sup>-2</sup> | Specific capacity / mAh g <sub>Zn</sub> <sup>-1</sup> | E / Wh kg <sub>Zn</sub> <sup>-1</sup> | Ref.                                                                                                                                                                                                         |
|-------------------------------------------|----------------------------------------------|------------------------------------------------|--------------------------|------------------------|-------------------------------------------------------|---------------------------------------|--------------------------------------------------------------------------------------------------------------------------------------------------------------------------------------------------------------|
| FeCo@MN<br>C                              | 6.0 M KOH<br>+ 0.20 M<br>Zn(Ac) <sub>2</sub> | 3.2                                            | 1.41                     | 115.0                  | --                                                    | --                                    | Appl. Catal. B 2019, 244, 150-158 Adv. Funct. Mater. 2018, 28 (14), 1706928 Adv. Energy Mater. 2017, 7, 1601172 Chem. Mater. 2020, 32, 3439-3446 Adv. Mater. 2016, 28, 3777-3784 Energy 2019, 166, 1241-1248 |
| FeNi@N-GR                                 | 6.0 M KOH<br>+ 0.20 M<br>Zn(Ac) <sub>2</sub> | 2.0                                            | 1.35                     | 85                     | 765                                                   | 940                                   | 2018, 28 (14), 1706928 Adv. Energy Mater. 2017, 7, 1601172 Chem. Mater. 2020, 32, 3439-3446 Adv. Mater. 2016, 28, 3777-3784 Energy 2019, 166, 1241-1248                                                      |
| Ni <sub>3</sub> Fe/N-C sheets             | 6.0 M KOH<br>+ 0.20 M<br>ZnCl <sub>2</sub>   | --                                             | --                       | --                     | 528                                                   | 634                                   | 2017, 7, 1601172 Chem. Mater. 2020, 32, 3439-3446 Adv. Mater. 2016, 28, 3777-3784 Energy 2019, 166, 1241-1248                                                                                                |
| S-LCO                                     | 6.0 M KOH<br>+ 0.20 M<br>Zn(Ac) <sub>2</sub> | 2.0                                            | 1.47                     | 92                     | 747                                                   | --                                    | 2020, 32, 3439-3446 Adv. Mater. 2016, 28, 3777-3784 Energy 2019, 166, 1241-1248                                                                                                                              |
| ZnCo <sub>2</sub> O <sub>4</sub> /N-CNT   | 6.0 M KOH<br>+ 0.20 M<br>ZnCl <sub>2</sub>   | 2.0                                            | 1.47                     | 82.3                   | 428.5                                                 | 595.6                                 | 2016, 28, 3777-3784 Energy 2019, 166, 1241-1248                                                                                                                                                              |
| Co <sub>3</sub> O <sub>4</sub> nanoplates | 6.0 M KOH<br>+ 0.20 M<br>Zn(Ac) <sub>2</sub> | 2.0                                            | --                       | 59.7                   | 702.4                                                 | 901.6                                 | 2019, 166, 1241-1248                                                                                                                                                                                         |
| MNSs@NG<br>A                              | 6.0 M KOH<br>+ 0.20 M<br>ZnCl <sub>2</sub>   | 2.0                                            | 1.52                     | 115.0                  | 794.6                                                 | 961.5                                 | This work                                                                                                                                                                                                    |

FeCo@MNC: mesoporous Fe/Co-N-C nanofibers with embedding FeCo nanoparticles

FeNi@N-GR: FeNi@N-graphene core-shell nanostructures

Ni<sub>3</sub>Fe/N-C: Ni<sub>3</sub>Fe nanoparticles embedded in porous nitrogen-doped carbon sheets

S-LCO: S-doped LaCoO<sub>3</sub>

ZnCo<sub>2</sub>O<sub>4</sub>/N-CNT: ZnCo<sub>2</sub>O<sub>4</sub>/N-doped-CNT



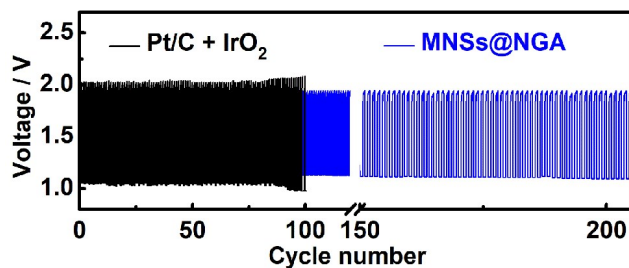

**Fig. S11** Long term cycling performance at a constant current density of  $10 \text{ mA cm}^{-2}$  of Zn-air batteries separately with MNSs@NGA and Pt/C + IrO<sub>2</sub> as air cathode.

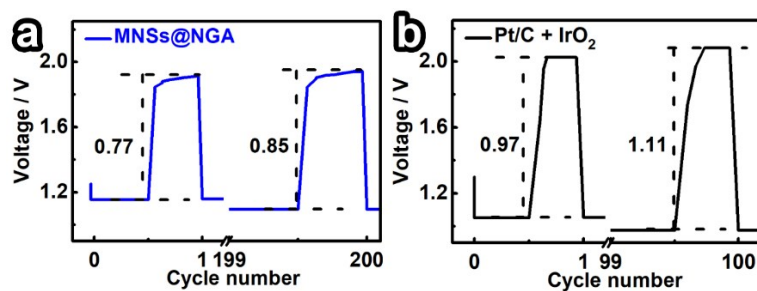

**Fig. S12** Enlarged 1st and corresponding cycle (200th and 100th) of the discharge-charge voltage profiles of Zn-air batteries with (a) MNSs@NGA and (b) Pt/C + IrO<sub>2</sub> catalyst as air cathode.

## References and notes

1. D. C. Marcano, D. V. Kosynkin, J. M. Berlin, A. Sinitskii, Z. Sun, A. Slesarev, L. B. Alemany, W. Lu and J. M. Tour, *ACS Nano*, 2010, **4**, 4806-4814.

2. J. Xin, R. J. Zhang and W. G. Hou, *J. Mater. Chem. B*, 2014, **2**, 3697-3704.
